# Supplementary material for: Physical Activity Level Using Doubly-Labeled Water in Relation to Body Composition and Physical Fitness in Preschoolers
Source: MDPI journal article supplement (doi:10.3390/medicina55010002), 2018-12-27
Supplement: s1 [file s1]

**Supplementary Figure 1.** Flow chart of the nested validation study in the MINISTOP trial.

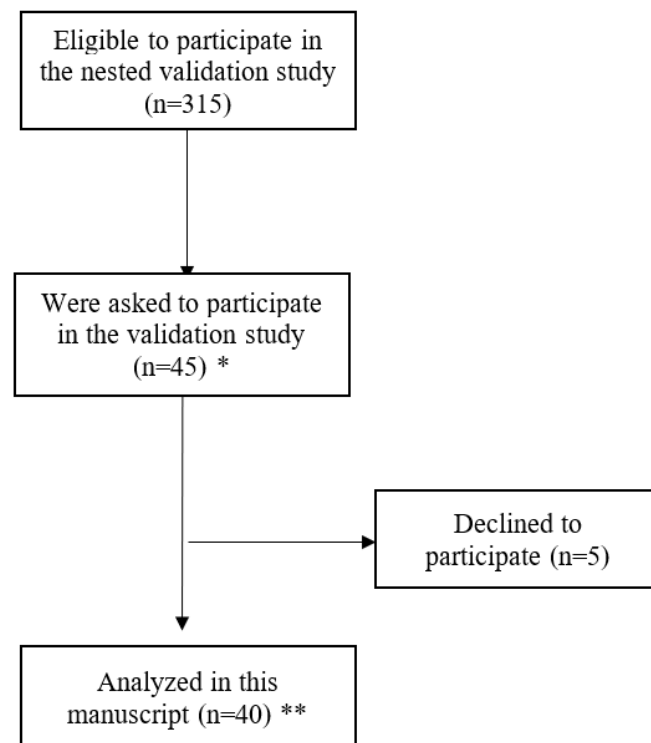

\* As reported in the methods section, parents coming back for the follow-up measurement at 12 months after baseline were asked to participate in this nested validation study in the order they came back to the measurement. A total of 45 parents were asked to participate to get the required 40 parent and child dyads. \*\*These parent and child dyads were not different with regards to baseline characteristics from the whole trial (n=315) [24,25].
